# Supplementary material for: Mechanical Thrombectomy in Patients with a Large Ischemic Volume at Presentation: Systematic Review and Meta-Analysis
Source: PubMed Central journal article supplement — J Stroke. 2021 Sep 30;23(3):358–66. doi: 10.5853/jos.2021.00724 (PMC8521249; doi:10.5853/jos.2021.00724), 2021-09-30
Supplement: jos-2021-00724-suppl1.pdf [file jos-2021-00724-suppl1.pdf]

**Supplementary Table 1.** Risk of bias of each individual non-randomised study according to the ROBINS-I Cochrane Collaboration tool

| Study/Criterion                       | 1 | 2  | 3 | 4  | 5 | 6 | 7  | 8 | Overall |
|---------------------------------------|---|----|---|----|---|---|----|---|---------|
| Published as full papers              |   |    |   |    |   |   |    |   |         |
| Haussen et al. (2016) <sup>17</sup>   | / | +  | - | /  | - | + | ++ | / | High    |
| Rebello et al. (2017) <sup>16</sup>   | - | ++ | - | ++ | + | + | ++ | + | Mild    |
| Chen et al. (2018) <sup>21</sup>      | - | +  | - | ++ | + | + | ++ | + | Mild    |
| Sarraj et al. (2019) <sup>19</sup>    | - | ++ | - | ++ | + | + | ++ | + | Mild    |
| Gilgen et al. (2015) <sup>6</sup>     | + | +  | - | ++ | + | + | ++ | - | Mild    |
| Panni et al. (2019) <sup>18</sup>     | + | +  | - | ++ | + | + | ++ | + | Mild    |
| Gautheron et al. (2018) <sup>15</sup> | / | +  | + | /  | + | + | ++ | / | Mild    |
| Yoshimoto et al. (2020) <sup>20</sup> | / | +  | + | /  | + | + | ++ | / | Mild    |
| Kerleroux et al. (2020) <sup>3</sup>  | / | +  | + | /  | + | + | ++ | / | Mild    |
| Published as abstracts                |   |    |   |    |   |   |    |   |         |
| None                                  |   |    |   |    |   |   |    |   |         |

Criteria used for the Cochrane "Tool to Assess Risk of Bias in Cohort Studies"

1. Was selection of exposed and non-exposed cohorts drawn from the same population?
  2. Can we be confident in the assessment of exposure?
  3. Can we be confident that the outcome of interest was not present at start of study?
  4. Did the study match exposed and unexposed for all variables that are associated with the outcome of interest or did the statistical analysis adjust for these prognostic variables?
  5. Can we be confident in the assessment of the presence or absence of prognostic factors?
  6. Can we be confident in the assessment of outcome?
  7. Was the follow-up of cohorts adequate?
  8. Were co-interventions similar between groups?
- Definitely yes (low risk of bias) ++; probably yes +; probably no -; definitely no (high risk of bias); not assessable /.
