# Supplementary material for: Mechanical Thrombectomy in Patients with a Large Ischemic Volume at Presentation: Systematic Review and Meta-Analysis
Source: PubMed Central journal article supplement — J Stroke. 2021 Sep 30;23(3):358–66. doi: 10.5853/jos.2021.00724 (PMC8521249; doi:10.5853/jos.2021.00724), 2021-09-30
Supplement: jos-2021-00724-suppl2.pdf [file jos-2021-00724-suppl2.pdf]

**Supplementary Table 2.** Risk of bias of each individual randomised study according to the ROB-2 Cochrane Collaboration tool

| Risk of bias in the two RCTs in the meta-analysis by Campbell et al. (2019) <sup>8</sup> | Berkhemer et al. (2015) <sup>9</sup> (MR CLEAN) | Bracard et al. (2016) <sup>10</sup> (THRACE) |
|------------------------------------------------------------------------------------------|-------------------------------------------------|----------------------------------------------|
| Random sequence generation                                                               | +                                               | +                                            |
| Allocation concealment                                                                   | +++                                             | +++                                          |
| Blinding (participants & personnel)                                                      | +++                                             | +++                                          |
| Blinding of outcome assessment                                                           | +                                               | -                                            |
| Outcome data (attrition)                                                                 | +                                               | +                                            |
| Selective reporting                                                                      | +                                               | ++                                           |
| Other sources of bias                                                                    | ++                                              | +                                            |
| Overall                                                                                  | Low                                             | Mild                                         |

We assessed individually the risk of bias of both RCTs<sup>9,10</sup> with patients with large ischemic stroke, included in the meta-analysis by Campbell et al.,<sup>8</sup> individually with the appropriate RoB-2 tool.<sup>11</sup> + Low risk of bias, +++ High risk of bias, - Not evaluable based on provided data. RCT, randomized controlled trial.

**Supplementary Table 3.** Quality measure of included studies by the Newcastle-Ottawa quality assessment scale

| Study                                                                                 | Selection |   |   |   | Comparability |   | Exposure (outcome) |   |   | Total |
|---------------------------------------------------------------------------------------|-----------|---|---|---|---------------|---|--------------------|---|---|-------|
|                                                                                       | 1         | 2 | 3 | 4 | a             | b | 1                  | 2 | 3 |       |
| Retrospective design (score 0 to 9; "high-quality"=studies with 6 or more stars)      |           |   |   |   |               |   |                    |   |   |       |
| Haussen et al. (2016) <sup>17</sup>                                                   | *         | * |   |   | *             |   | *                  |   |   | 4     |
| Rebello et al. (2017) <sup>16</sup>                                                   | *         | * | * | * | *             | * | *                  |   | * | 8     |
| Chen et al. (2018) <sup>21</sup>                                                      | *         | * | * | * | *             |   | *                  | * | * | 8     |
| Sarraj et al. (2019) <sup>19</sup>                                                    | *         | * | * | * | *             | * | *                  | * | * | 8     |
| Gilgen et al. (2015) <sup>6</sup>                                                     | *         | * | * |   | *             | * | *                  | * |   | 7     |
| Panni et al. (2019) <sup>18</sup>                                                     | *         |   | * | * | *             |   | *                  | * | * | 8     |
| Gautheron et al. (2018) <sup>15</sup>                                                 | *         | * |   |   | *             | * | *                  |   | * | 6     |
| Yoshimoto et al. (2020) <sup>20</sup>                                                 | *         | * | * | * | *             | * | *                  |   | * | 8     |
| Kerleroux et al. (2020) <sup>3</sup>                                                  | *         | * |   | * | *             | * | *                  | * | * | 8     |
| Prospective design/cohort (score 0 to 9; "high-quality"=studies with 6 or more stars) |           |   |   |   |               |   |                    |   |   |       |
| Berkhemer et al. (2015) <sup>9</sup> (MR CLEAN)                                       | *         | * |   | * | *             | * | *                  | * | * | 9     |
| Bracard et al. (2016) <sup>10</sup> (THRACE)                                          | *         | * |   | * | *             | * | *                  | * | * | 8     |

Each star (\*) indicates one point of the scale. a: Comparability (point A) was tested comparing the final modified Rankin Scale 0–2 among the thrombectomy group vs. the control group (or successful reperfusion group vs. unsuccessful reperfusion group); b: Comparability (point B) was tested comparing the secondary outcomes (mortality, symptomatic intracranial hemorrhage) among the thrombectomy group vs. the control group (or successful reperfusion group vs. unsuccessful reperfusion group).
