# Supplementary material for: Mechanical Thrombectomy in Patients with a Large Ischemic Volume at Presentation: Systematic Review and Meta-Analysis
Source: PubMed Central journal article supplement — J Stroke. 2021 Sep 30;23(3):358–66. doi: 10.5853/jos.2021.00724 (PMC8521249; doi:10.5853/jos.2021.00724), 2021-09-30
Supplement: jos-2021-00724-suppl5.pdf [file jos-2021-00724-suppl5.pdf]

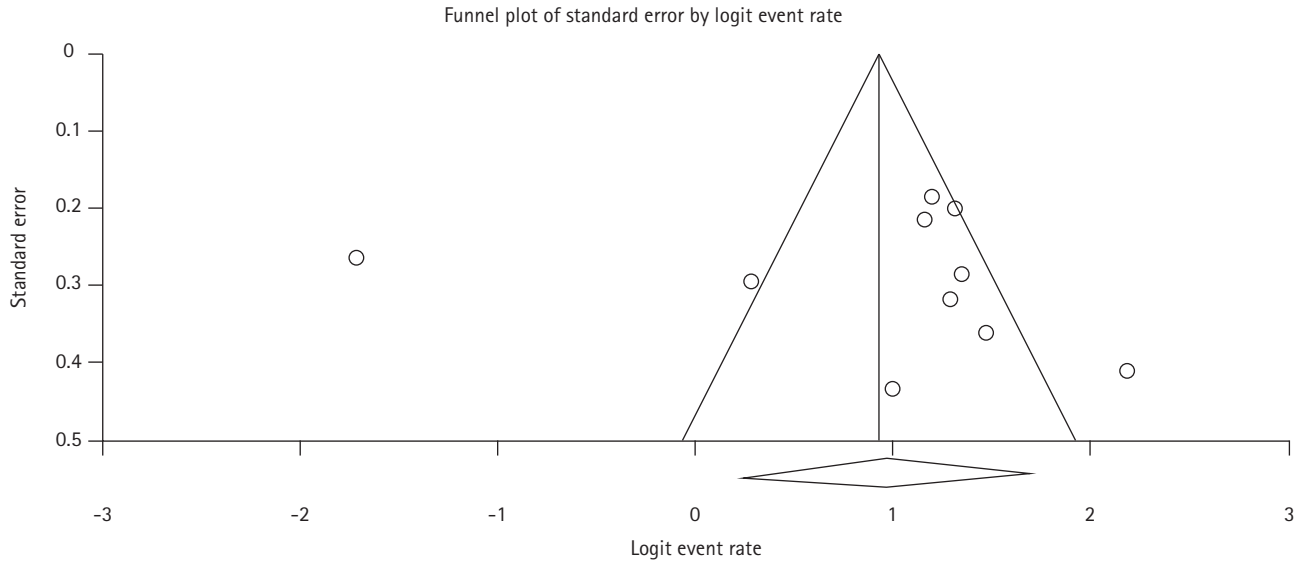

**Supplementary Figure 1.** Funnel plot for aggregate proportion of unfavorable outcome. Each dot represents a study; the y-axis represents the size of the study (e.g., number of subjects) and the x-axis shows the result of the study (e.g., the intervention's measured average effect). Asymmetric funnel plot suggesting a relationship between treatment effect and study size.

| Study name              | Statistics for study removed |              |         |          | Rate of 90-day unfavorable outcome and 99% CI |    |
|-------------------------|------------------------------|--------------|---------|----------|-----------------------------------------------|----|
|                         | Event rate                   | 99% CI       | Z-value | P-value* |                                               |    |
| Gilgen et al. (2015)    | 0.70                         | [0.65; 0.75] | 9.05    | 0.00     |                                               | —□ |
| Haussen et al. (2016)   | 0.71                         | [0.66; 0.75] | 9.67    | 0.00     |                                               | —□ |
| Rebello et al. (2017)   | 0.70                         | [0.64; 0.74] | 9.11    | 0.00     |                                               | —□ |
| Gautheron et al. (2018) | 0.70                         | [0.65; 0.75] | 9.26    | 0.00     |                                               | —□ |
| Chen et al. (2018)      | 0.77                         | [0.72; 0.81] | 12.69   | 0.00     |                                               | —□ |
| Campbell et al. (2019)  | 0.70                         | [0.65; 0.75] | 9.25    | 0.00     |                                               | —□ |
| Panni et al. (2019)     | 0.69                         | [0.63; 0.74] | 8.13    | 0.00     |                                               | —□ |
| Sarraj et al. (2019)    | 0.70                         | [0.64; 0.75] | 8.64    | 0.00     |                                               | —□ |
| Yoshimoto et al. (2020) | 0.72                         | [0.67; 0.77] | 10.09   | 0.00     |                                               | —□ |
| Kerleroux et al. (2020) | 0.69                         | [0.64; 0.74] | 8.25    | 0.00     |                                               | —□ |
| Overall                 | 0.71                         | [0.66; 0.75] | 9.93    | 0.00     |                                               | ◆  |

**Supplementary Figure 2.** One study removed analysis. This forest plot displays the summary values computed when that row's study is removed from the meta-analysis. Unfavorable outcome=modified Rankin Scale of 3 or more at day 90. CI, confidence interval. \*P-value for heterogeneity.
