# Supplementary material for: Mechanical Thrombectomy in Patients with a Large Ischemic Volume at Presentation: Systematic Review and Meta-Analysis
Source: PubMed Central journal article supplement — J Stroke. 2021 Sep 30;23(3):358–66. doi: 10.5853/jos.2021.00724 (PMC8521249; doi:10.5853/jos.2021.00724), 2021-09-30
Supplement: jos-2021-00724-suppl8.pdf [file jos-2021-00724-suppl8.pdf]

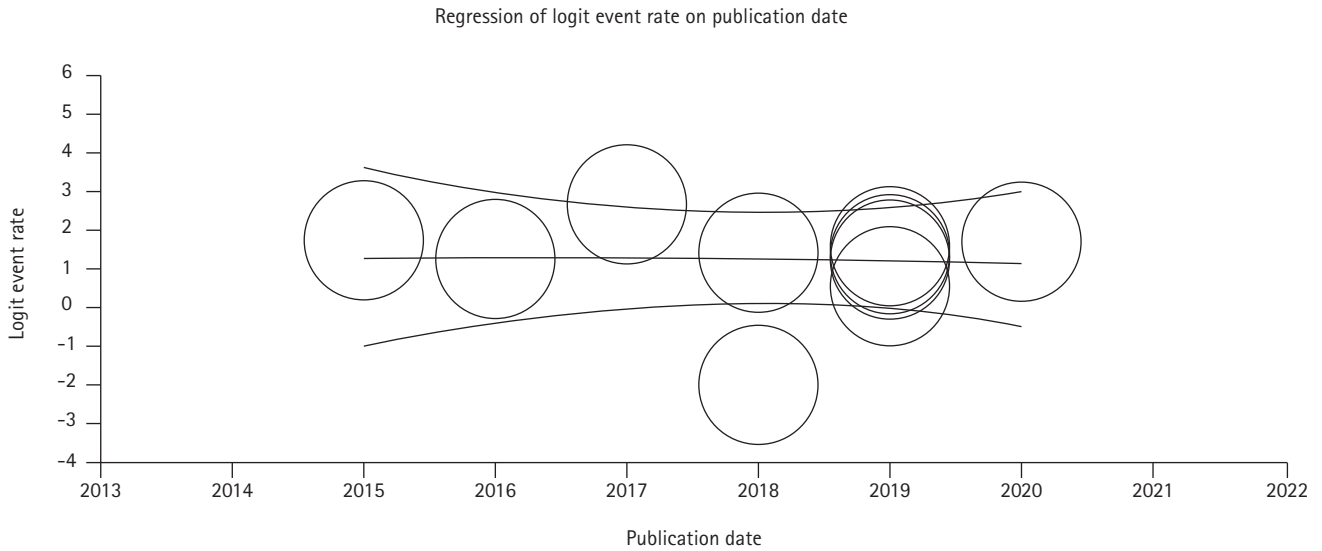

**Supplementary Figure 3.** Regression analysis of publication date. Meta regression is an extension to aggregated estimates, that assesses the extent of heterogeneity related to study-specific variables. This bubble plot is a visual representation of the fitted regression line with circles representing the estimates from each study, sized according to the precision of each estimate. Circles that diverge from the regression translate to important heterogeneity, and the inclination of the fitted line provides a visual representation of the effect of the studied variable on the estimates, here publication date.

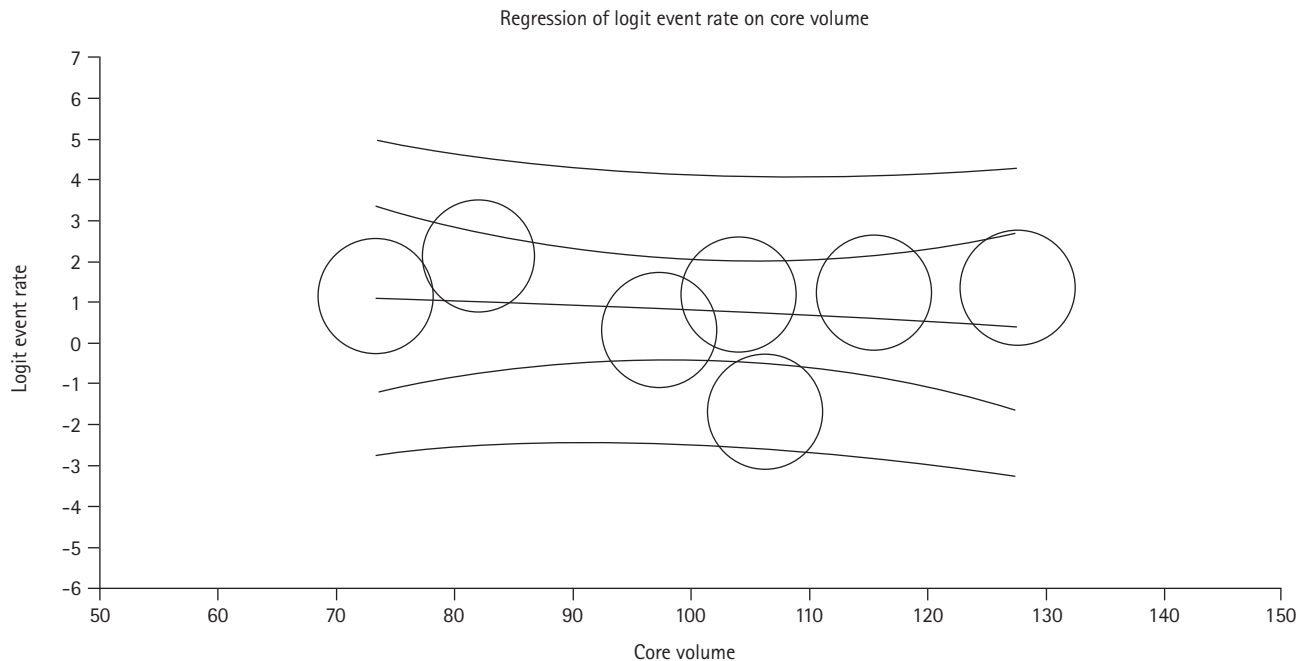

**Supplementary Figure 4.** Meta regression of unfavorable outcome according to reported study mean infarct core volumes. Meta regression is an extension to aggregated estimates, that assesses the extent of heterogeneity related to study-specific variables. This bubble plot is a visual representation of the fitted regression line with circles representing the estimates from each study, sized according to the precision of each estimate. Circles that diverge from the regression translate to important heterogeneity, and the inclination of the fitted line provides a visual representation of the effect of the studied variable on the estimates, here mean core volume in each study.
