# Supplementary material for: Mechanical Thrombectomy in Patients with a Large Ischemic Volume at Presentation: Systematic Review and Meta-Analysis
Source: PubMed Central journal article supplement — J Stroke. 2021 Sep 30;23(3):358–66. doi: 10.5853/jos.2021.00724 (PMC8521249; doi:10.5853/jos.2021.00724), 2021-09-30
Supplement: jos-2021-00724-suppl9.pdf [file jos-2021-00724-suppl9.pdf]

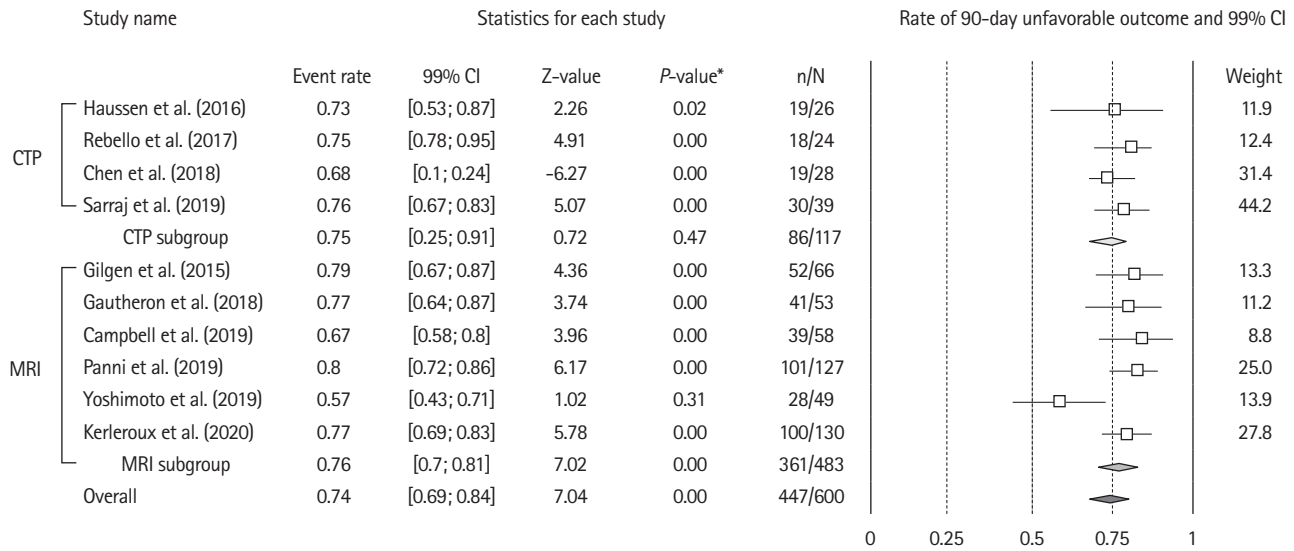

**Supplementary Figure 5.** Forest plot of the rates of patients with 90-day unfavorable outcome after mechanical thrombectomy with subgroup analysis per study imaging selection modality. Unfavorable outcome=modified Rankin Scale of 3 or more at day 90. CI, confidence interval; CTP, computed tomography-perfusion; MRI, magnetic resonance imaging. \**P*-value for heterogeneity.

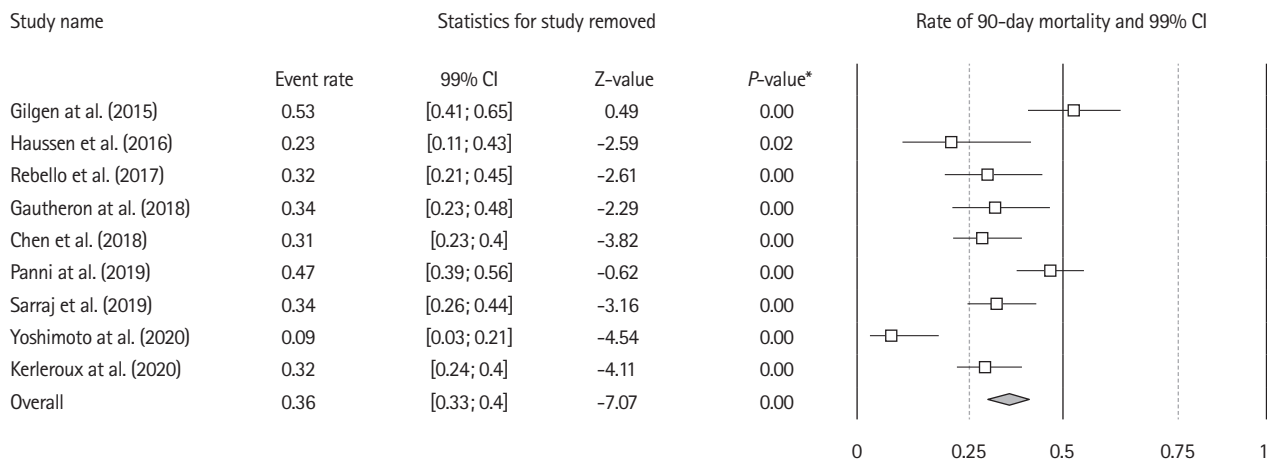

**Supplementary Figure 6.** Forest plot for the rates of 90-day mortality. CI, confidence interval. \**P*-value for heterogeneity.
