# Supplementary material for: Mechanical Thrombectomy in Patients with a Large Ischemic Volume at Presentation: Systematic Review and Meta-Analysis
Source: PubMed Central journal article supplement — J Stroke. 2021 Sep 30;23(3):358–66. doi: 10.5853/jos.2021.00724 (PMC8521249; doi:10.5853/jos.2021.00724), 2021-09-30
Supplement: jos-2021-00724-suppl12.pdf [file jos-2021-00724-suppl12.pdf]

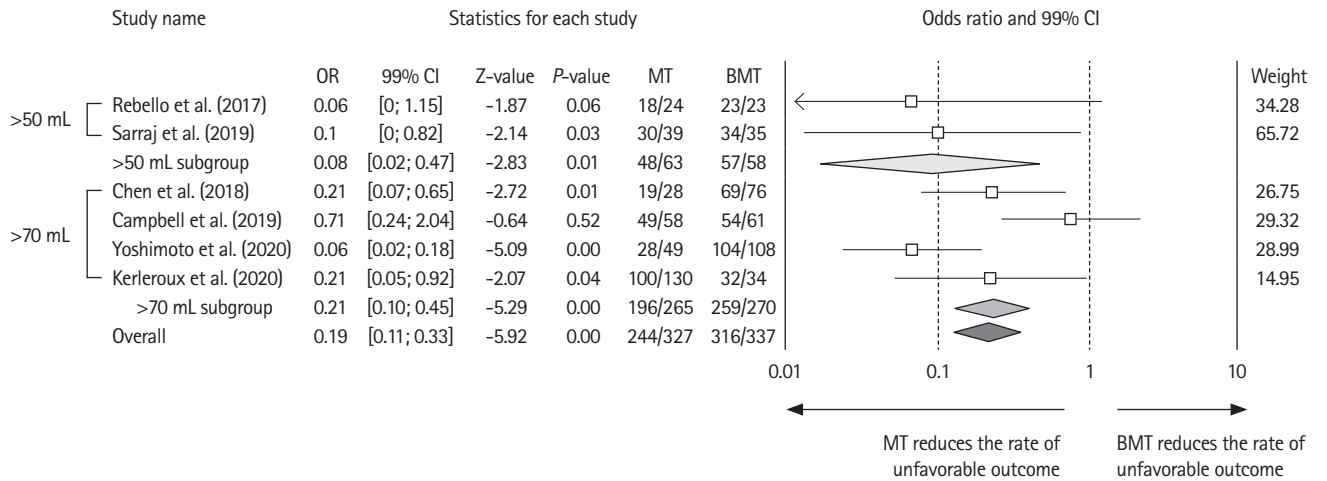

A

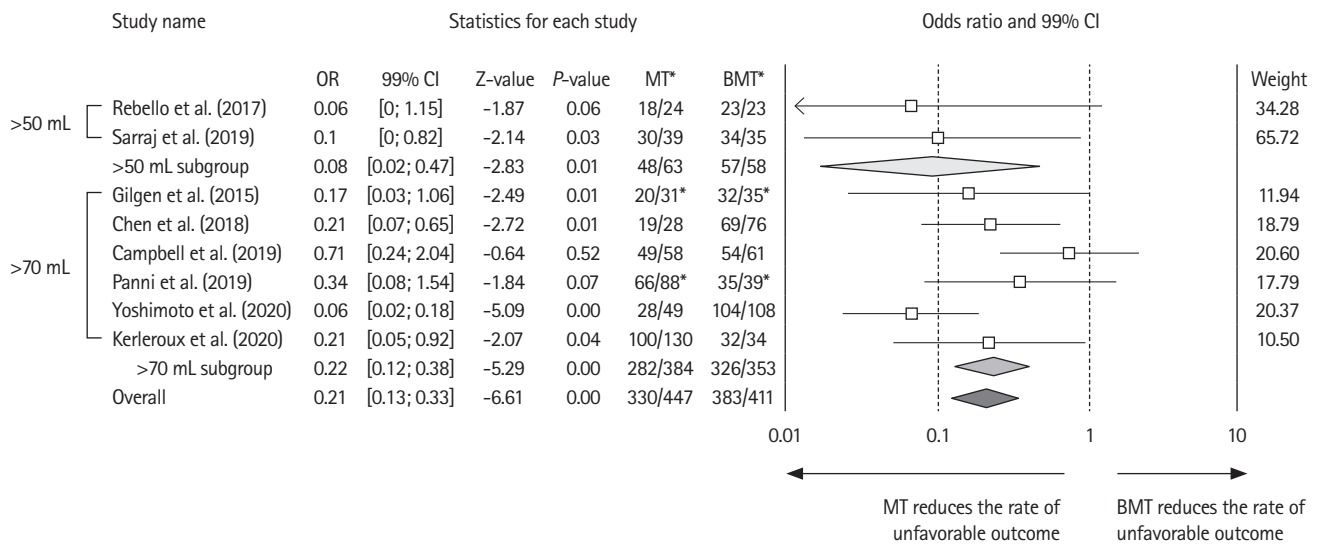

B

**Supplementary Figure 8.** (A) Forest plot showing the effect of mechanical thrombectomy (MT) vs best medical treatment (BMT) on 90-day unfavorable outcome with subgroup analysis per large infarct volume definition (>50/70 mL). (B) Forest plot including studies with successful (thrombolysis in cerebral infarction [TICI] 2b-3) vs unsuccessful (TICI 0-2a) reperfusion. Unfavorable outcome=modified Rankin Scale of 3 or more at day 90. OR, odds ratio; CI, confidence interval. \*Or successful vs unsuccessful reperfusion.
