# Supplementary material for: Mechanical Thrombectomy in Patients with a Large Ischemic Volume at Presentation: Systematic Review and Meta-Analysis
Source: PubMed Central journal article supplement — J Stroke. 2021 Sep 30;23(3):358–66. doi: 10.5853/jos.2021.00724 (PMC8521249; doi:10.5853/jos.2021.00724), 2021-09-30
Supplement: jos-2021-00724-suppl13.pdf [file jos-2021-00724-suppl13.pdf]

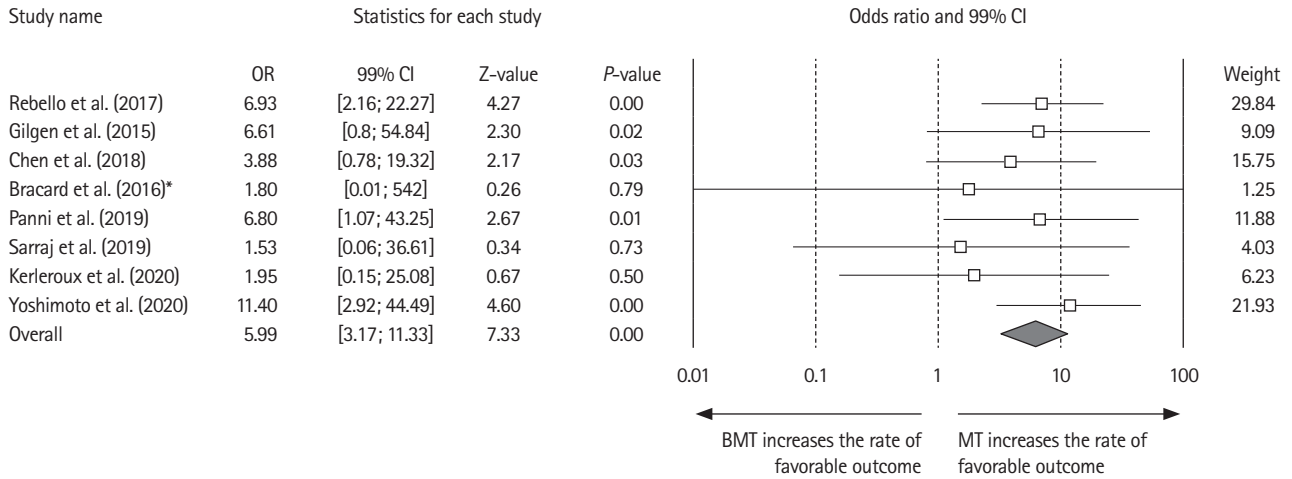

**Supplementary Figure 9.** Forest plot of mechanical thrombectomy (MT) effect on 90-day favorable outcome, using pooled adjusted odds ratio (OR). Favorable outcome=modified Rankin Scale of 2 or less at day 90. CI, confidence interval; BMT, best medical treatment.

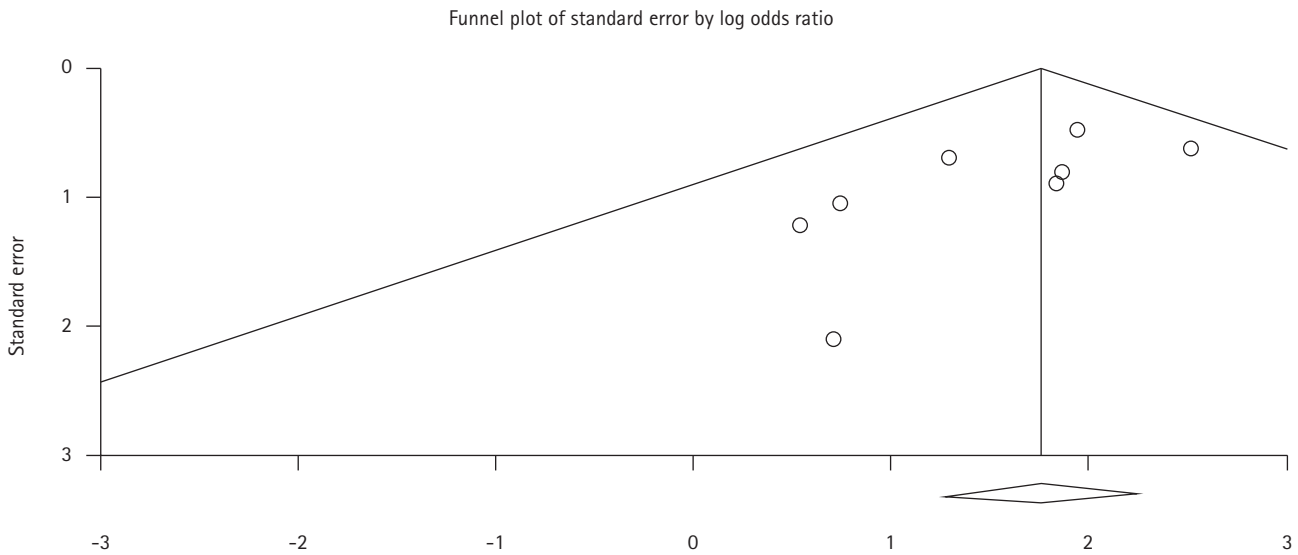

**Supplementary Figure 10.** Funnel plot for adjusted odds ratio of favorable functional outcome. Each dot represents a study; the y-axis represents the size of the study (e.g., number of subjects) and the x-axis shows the result of the study (e.g., the intervention's measured average effect). Asymmetric funnel plot suggesting a relationship between treatment effect and study size. Favorable outcome=modified Rankin Scale of 2 or less at day 90.
